# Supplementary material for: Cellular geometry scaling ensures robust division site positioning
Source: PubMed Central journal article supplement (PMC6341079; doi:10.1038/s41467-018-08218-2), 2019-01-21
Supplement: 41467_2018_8218_MOESM1_ESM.pdf [file 41467_2018_8218_MOESM1_ESM.pdf]

## **Supplementary information**

Cellular geometry scaling ensures robust division site positioning  
Ying Gu and Snezhana Oliferenko

### **This file includes:**

Supplementary figures 1 to 5  
Supplementary tables 1 and 2

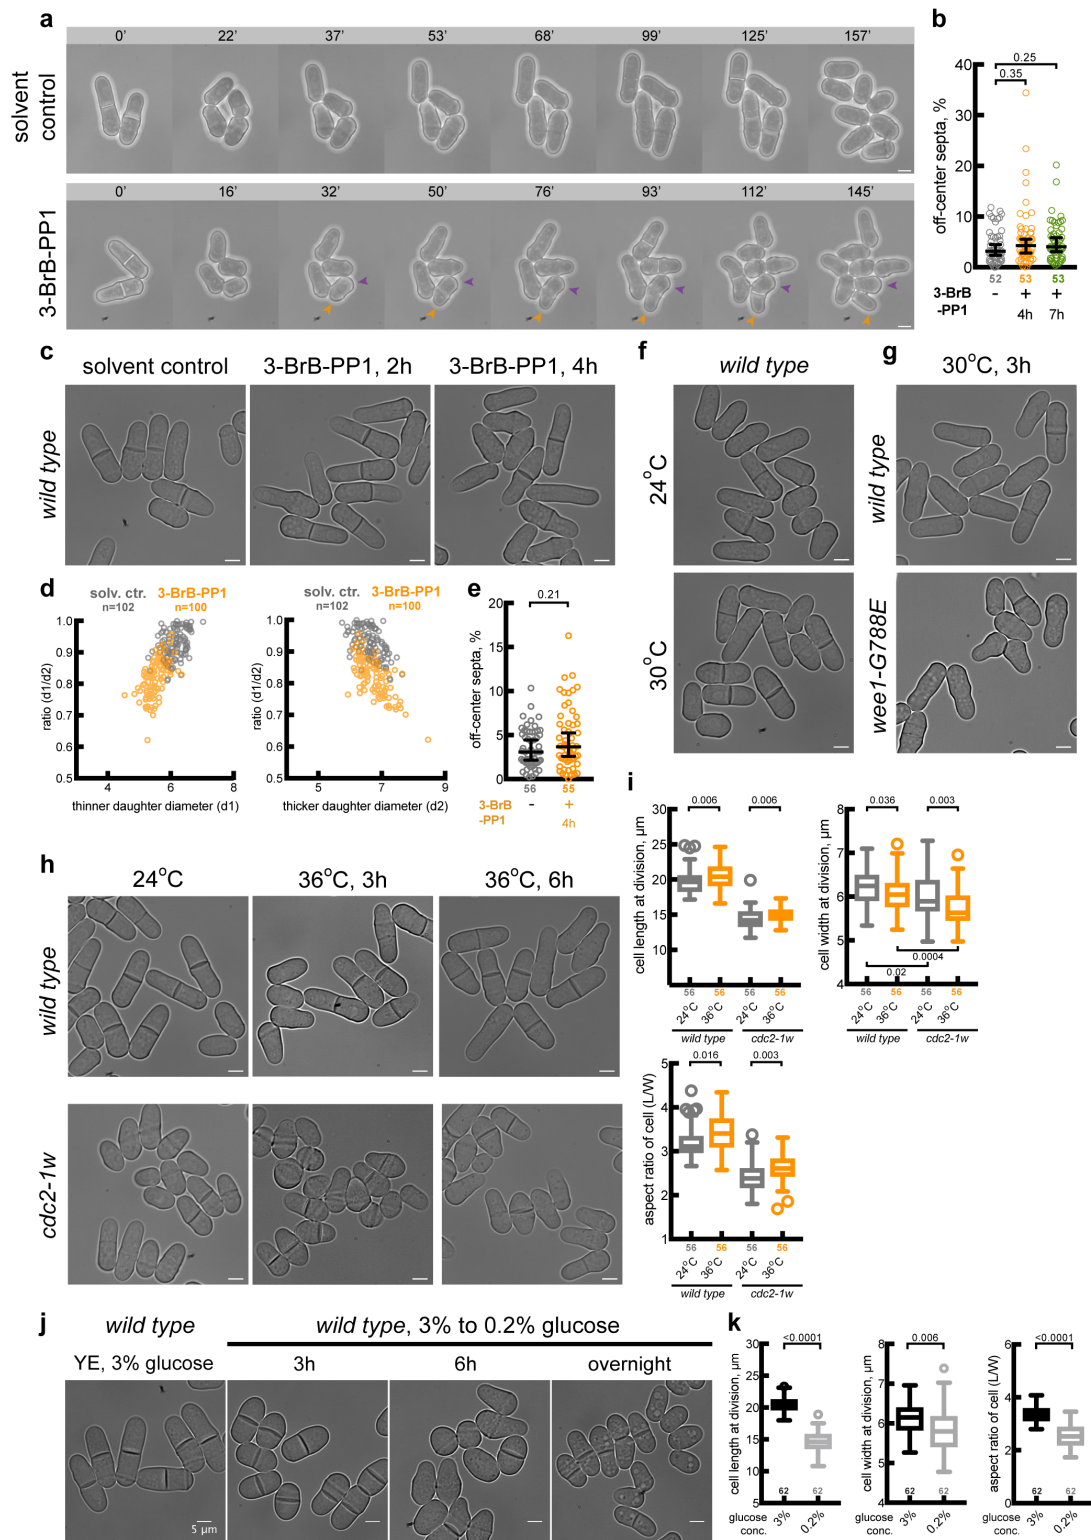

Supplementary figure 1. *S. japonicus* scales its geometry in a variety of experimental conditions. (a) Time-lapse montages of maximum intensity z-projected bright-field images of *S. japonicus* *wee1-as8* cells in methanol

(solvent control) (*top*) or 20  $\mu$ M 3-BrB-PP1 (*bottom*). Methanol or 3-BrB-PP1 was administered one hour prior to imaging. Orange arrowheads point toward a hyperpolarizing cell end whereas magenta arrowheads indicate the other, thicker cell end. **(b)** A plot summarizing the accuracy of division plane positioning in methanol- or 3-BrB-PP1-treated *wee1-as8* cells shown in Fig. 1a. **(c)** *S. japonicus* wild type cells incubated with 20  $\mu$ M 3-BrB-PP1 for indicated time. **(d)** A 2-hour treatment with 3-BrB-PP1 causes mild hyperpolarization at one cell tip in wild type cells, indicative of off-target effects. Shown are the scatter plots, where either 'thinner' (*top*) or 'thicker' (*bottom*) daughter cell diameter measurements are on x-axis, and the ratios between diameters of the daughters are on y-axis. **(e)** A plot summarizing the accuracy of division plane positioning shown in **(c)**. **(f)** Representative images of wild type cells cultured at 24°C (*top*) and 30°C (*bottom*). **(g)** *S. japonicus* wild type and *wee1-G788E* mutant (*bottom*) cells shifted from 24°C to 30°C for 3 hours. **(h)** *S. japonicus* wild type (*top*) and *cdc2-1w* mutant (*bottom*) cells cultured at 24°C, and upon the shift to 36°C for 3 and 6 hours. **(i)** Measurements of cellular length, width and aspect ratio of the wild type as compared to *cdc2-1w* cells at the 6-hour time point, shown in **(h)**. **(j)** *S. japonicus* cells grown in YE with 3% glucose and shifted to YE-0.2% glucose for 3, 6 hours and overnight. **(k)** Quantifications of cell length, width and aspect ratio at division in YE with 3% glucose and 0.2% glucose overnight, for cells shown in **(j)**. **(c, f, g, h, j)** Shown are single z-plane bright-field micrographs of live cells; scale bars represent 5  $\mu$ m. **(b and e)** Shown as 1D-scatter plots. Deviation from the geometric center of the cell is indicated on y-axis. Black bars represent sample median with error bars indicating 95%

confidence intervals. **(i, k)** Quantifications presented as box plots with whiskers calculated by the Tukey method. *n* indicated in figures; *p* values derived from Kolmogorov-Smirnov test.

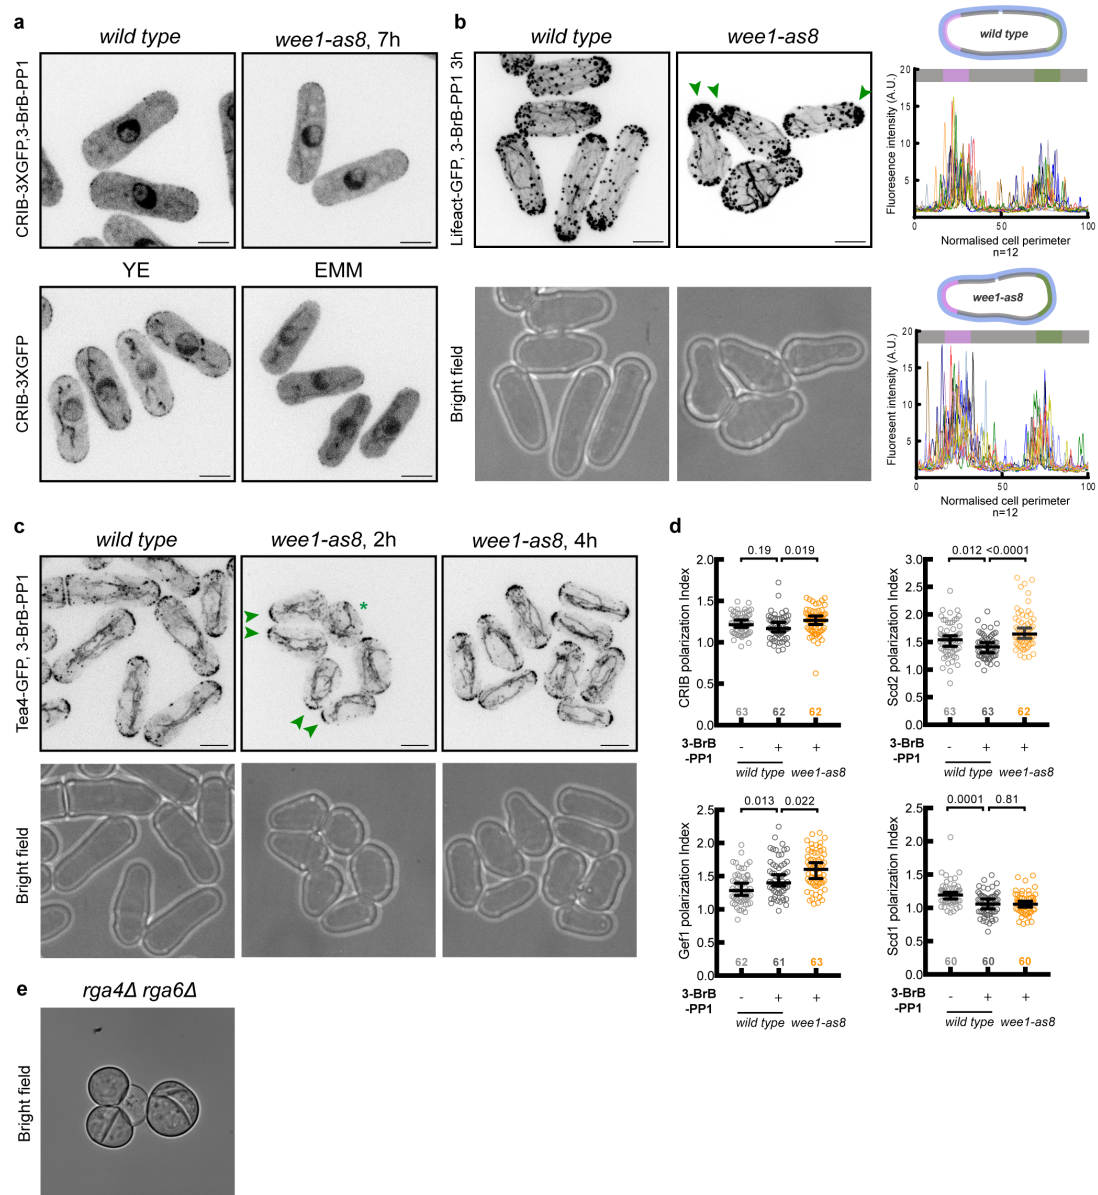

Supplementary figure 2. Localization of cellular polarity factors in control *S. japonicus* cells and during the process of scaling. (a) Following scaling, cells do not show relative enrichment of Cdc42 activity at cell tips. Spinning disk confocal micrographs of *S. japonicus* CRIB-3xGFP-expressing wild type and *wee1-as8* cells grown in indicated experimental conditions. (b) *S. japonicus* wild type and *wee1-as8* cells expressing LifeAct-GFP and the corresponding bright-field images. Green arrowheads indicate hyperpolarized cell tips. Cortical LifeAct-GFP fluorescence intensities (y-axis) normalized to cell

perimeter (x-axis) (*right*) indicate F-actin enrichment at hyperpolarizing tips in Wee1-inhibited cells. (c) 3-BrB-PP1-treated *S. japonicus* wild type and *wee1-as8* cells expressing Tea4-GFP and the corresponding bright-field images. Tea4 is preferentially enriched at the hyperpolarized cell tip in Wee1-inhibited cells (indicated by green arrowheads). Note that Tea4 does not exhibit specific cortical localization in a depolarized Wee1-inhibited cell at a 2-hour time-point (indicated by a green star). (d) Graphs showing relative fluorescence intensities of indicated marker proteins at thinner cell tips, for cells shown in Fig. 2c. Shown as 1D-scatter plots. Black bars represent sample median with error bars indicating 95% confidence intervals. n indicated in figures; *p* values derived from Kolmogorov-Smirnov test. (e) Single z-plane bright-field micrographs of *S. japonicus rga4Δrga6Δ* cells. Simultaneous removal of both Cdc42 GAPs Rga4 and Rga6 in *S. japonicus* gives rise to virtually spherical cells, indicating cooperation between these two GAPs in maintaining polarized growth. (a-c) shown are maximum intensity z-projections of spinning-disk confocal micrographs of cells. (a-c, e) Scale bars represent 5  $\mu\text{m}$ .

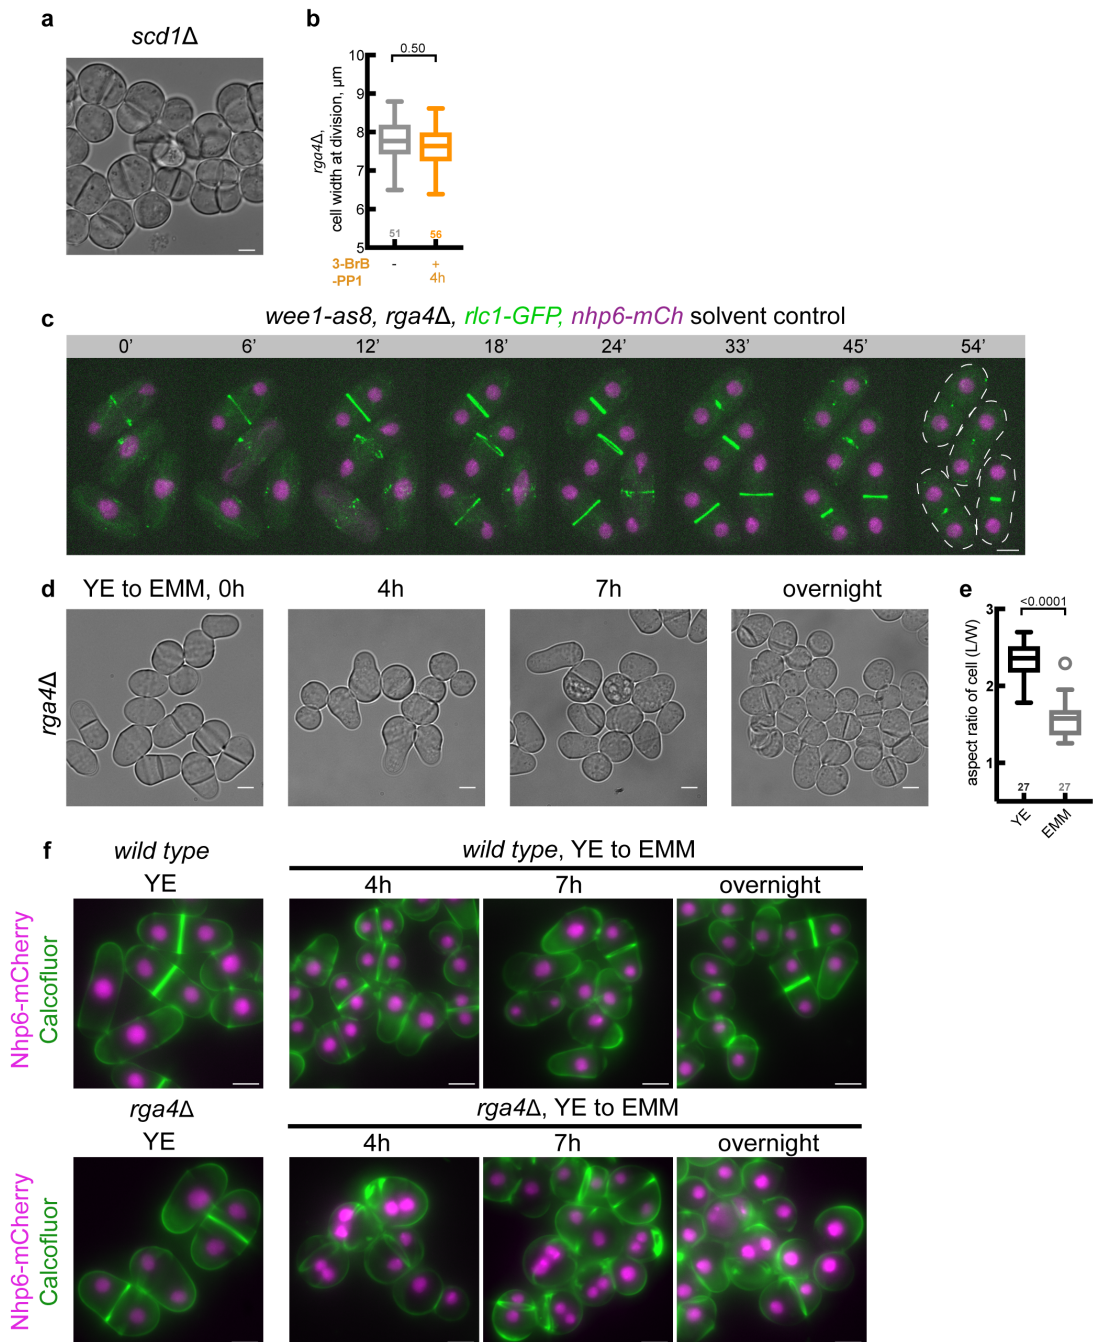

Supplementary figure 3. Rga4 is required for geometrical scaling in *S. japonicus*. (a) Representative image of *S. japonicus scd1Δ* cells. *S. japonicus* cells grown on YES agar lacking Cdc42 GEF Scd1 are defective in establishing polarized growth and cannot proliferate in the liquid YES medium. (b) Graph representing cell width at division for *rga4Δ S. japonicus* cells treated with solvent or 3-BrB-PP1 for 4 hours. (c) Time-lapse montage of

maximum intensity z-projected spinning-disk confocal micrographs of methanol-treated (as solvent control) *wee1-as8 rga4Δ S. japonicus* cells expressing Rlc1-GFP and Nhp6-mCherry. Myosin complexes assemble into medially positioned rings in these cells. Cell boundaries are outlined by white dashed lines. **(d)** *S. japonicus rga4Δ* cells after the shift from YE to EMM medium for 0, 4 and 7 hours followed by overnight incubation in EMM. **(e)** Graph showing cellular aspect ratio of cells with division septa shown in **(d)** before and after overnight incubation in EMM. **(f)** Pseudocolored maximum intensity z-projected epifluorescence images of wild type (*top*) and *rga4Δ S. japonicus* cells (*bottom*) expressing nuclear Nhp6-mCherry (magenta) stained with Calcofluor White (green) to visualize division septa under indicated conditions. Note that *rga4Δ* cells fail to rescale cell geometry after nutritional shift and display off-center division septa giving rise to bi-nucleated daughter cells after incubation in EMM. **(a and d)** Shown are single z-plane bright-field micrographs. **(a, c, d and f)** Scale bars represent 5  $\mu\text{m}$ . **(b, e)** Box plots with whiskers; *n* indicated in figures; *p* values derived from Kolmogorov-Smirnov test.



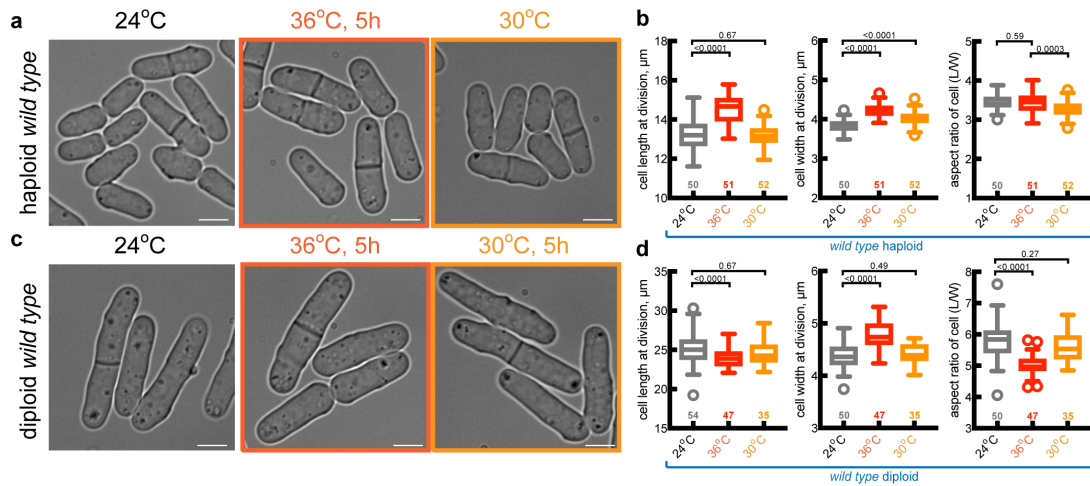

Supplementary figure 4. Analyses of wild type *S. pombe* cells grown at different physiological temperatures. **(a)** *S. pombe* wild type haploid cells grown at 24°C overnight (grey), shifted to 36°C for 5 hours (red) or grown at 30°C overnight (orange). **(b)** Quantifications of cell length, width and aspect ratio at division of wild type *S. pombe* haploid cells at indicated temperatures shown in **(a)**. **(c)** *S. pombe* wild type diploid cells grown at 24°C overnight (grey), shifted to 36°C for 5 hours (red) or grown at 30°C for 5 hours (orange). **(d)** Quantifications of cell length, width and aspect ratio at division of wild type *S. pombe* diploid cells at indicated temperatures shown in **(c)**. **(a and c)** Scale bars represent 5 μm. **(b and d)** Presented are box plots with whiskers calculated by the Tukey method. n indicated in figures; *p* values derived from Kolmogorov-Smirnov test.

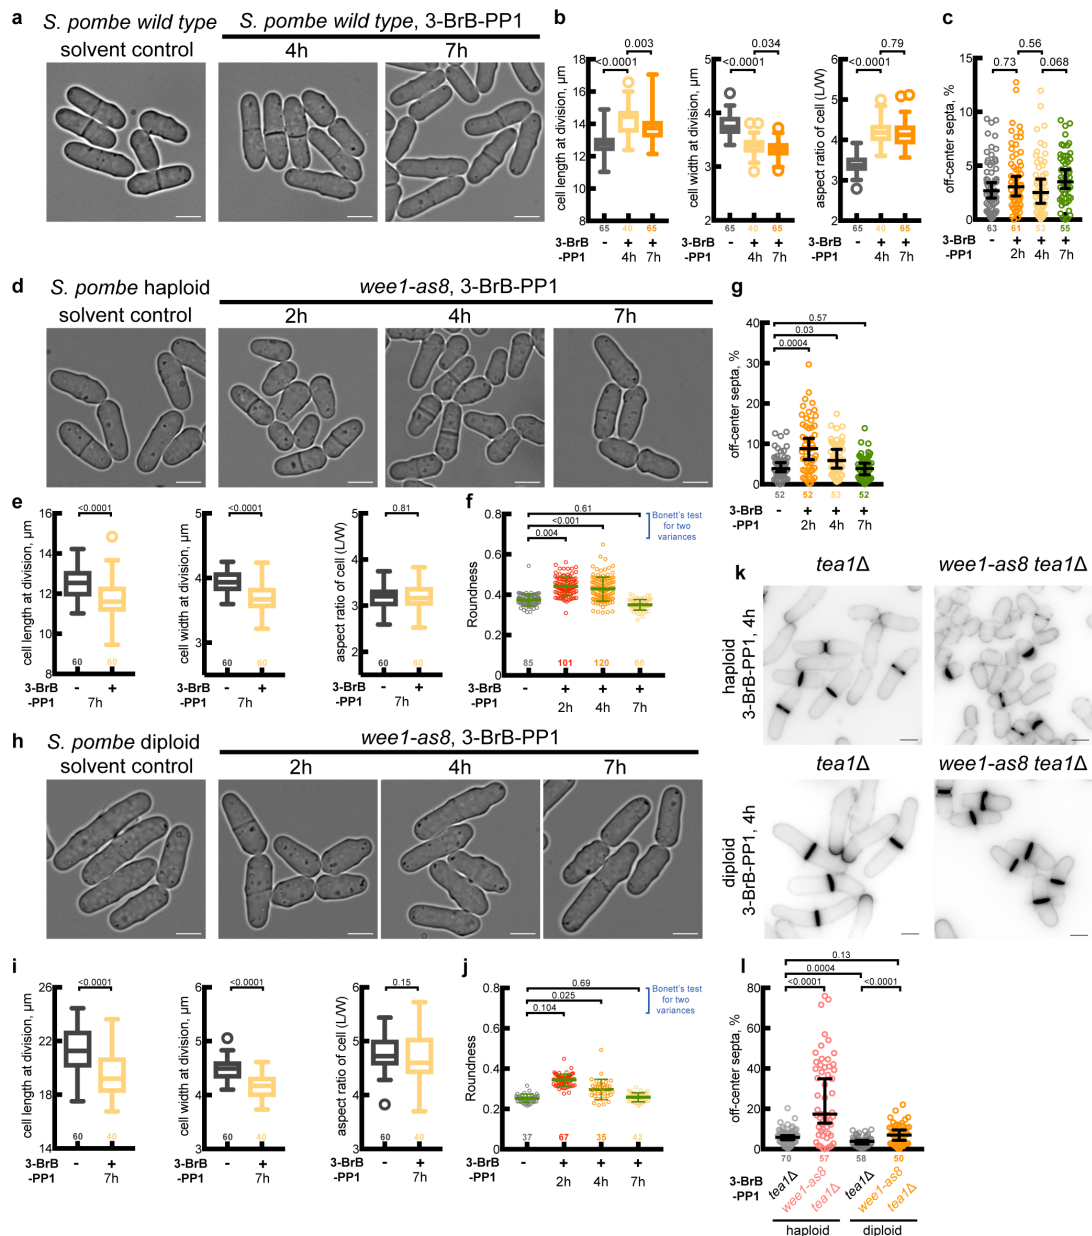

**Supplementary figure 5. Analyses of wild type and *wee1-as8* *S. pombe* cells grown in the presence of the ATP analog 3-BrB-PP1.** (a) *S. pombe* wild type cells incubated with 20  $\mu\text{M}$  3-BrB-PP1 for indicated time. (b) Quantifications of cell length, width and aspect ratio at division of cell population represented in (a). (c) A plot summarizing the accuracy of division plane positioning shown in (a). (d) *S. pombe* *wee1-as8* haploid cells incubated with methanol (solvent control) or 20  $\mu\text{M}$  ATP analog 3-BrB-PP1 for 2, 4 and 7 hours. (e)

Quantifications of cell length, width and aspect ratio at division after Wee1 inhibition in *S. pombe wee1-as8* haploids shown in (d). (f) Cell shape at division was assessed using roundness parameter as a proxy, where spherical cells are assigned a roundness value of 1. Shown is a plot of the distribution of cell roundness values within an *S. pombe wee1-as8* haploid population treated with 20  $\mu$ M 3-BrB-PP1 for indicated time points shown in (d). (g) A plot summarizing the accuracy of division plane positioning in methanol- or 20  $\mu$ M 3-BrB-PP1-treated *S. pombe wee1-as8* haploid cells at different time points shown in (d). Deviation from the geometric center of the cell is indicated on y-axis. (h) *S. pombe wee1-as8* diploid cells incubated with methanol or 20 $\mu$ M 3-BrB-PP1 for 2, 4 and 7 hours. (i) Quantifications of cell length, width and aspect ratio at division after Wee1 inhibition in *S. pombe wee1-as8* diploid cells shown in (h). (j) A plot showing the distribution of cell roundness values within an *S. pombe wee1-as8* diploid population treated with 20  $\mu$ M 3-BrB-PP1 for indicated time points shown in (h). (k) Maximum intensity z-projections of epifluorescence images of Calcofluor White-stained live *S. pombe tea1 $\Delta$*  and *wee1-as8 tea1 $\Delta$*  haploid (top) and diploid (bottom) cells incubated with 20  $\mu$ M 3-BrB-PP1 for 4 hours. (l) A plot summarizing the accuracy of division plane positioning in 3-BrB-PP1-treated cells shown in (k). (a, d, h) Shown are single z-plane bright-field micrographs. Scale bars represent 5  $\mu$ m. (b, e, i) Presented are box plots with whiskers; n indicated in figures; *p* values derived using Kolmogorov-Smirnov test. (f, j) *p* values derived using Bonett's test for two variances. Green bars represent sample mean. Error bars represent standard deviation. (c, g, l) Shown are 1D scatter plots;\_black bars represent sample median with error bars indicating 95%

confidence intervals.  $n$  indicated in figures;  $p$  values derived using Kolmogorov-Smirnov test.

| <b><i>Schizosaccharomyces japonicus</i></b> |                                                                                 |
|---------------------------------------------|---------------------------------------------------------------------------------|
| <b>Collection No.</b>                       | <b>Genotype</b>                                                                 |
| SOJ5                                        | NIG2028 matsj-P2028 h- (prototroph)                                             |
| SOJ2876                                     | <i>wee1-as8::kanR</i> h- (prototroph)                                           |
| SOJ3414                                     | <i>wee1-G788E::ura4+ ura4sj-D3</i> h-                                           |
| SOJ3312                                     | <i>cdc2-1w::ura4+ ura4sj-D3</i>                                                 |
| SOJ1345                                     | CRIB-3xGFP:: <i>ura4+ ura4sj-D3</i> h+                                          |
| SOJ2443                                     | <i>wee1-as8::ura4+ CRIB-3xGFP::ura4+ ura4sj-D3</i> h-                           |
| SOJ638                                      | Lifeact-GFP:: <i>ura4+ nhp6-mCherry::ura4 ura4sj-D3</i>                         |
| SOJ2459                                     | <i>wee1-as8::ura4+ Lifeact-GFP::ura4+ nhp6-mCherry::ura4 ura4sj-D3</i> h-       |
| SOJ2465                                     | <i>tea4-GFP::ura4+ nhp6-mCherry::ura4+ ura4sj-D3</i>                            |
| SOJ2464                                     | <i>wee1-as8::ura4+ tea4-GFP::ura4+ ura4sj-D3</i>                                |
| SOJ2504                                     | <i>gef1-mNeonGreen::kanR nhp6-mCherry::ura4+ ura4sj-D3</i>                      |
| SOJ2503                                     | <i>wee1-as8::ura4+ gef1-mNeonGreen::kanR ura4sj-D3</i>                          |
| SOJ2507                                     | <i>scd1-mNeonGreen::kanR nhp6-mCherry::ura4+ ura4sj-D3</i>                      |
| SOJ2506                                     | <i>wee1-as8::ura4+ scd1-mNeonGreen::kanR ura4sj-D3</i>                          |
| SOJ2509                                     | <i>rga4-mNeonGreen::kanR nhp6-mCherry::ura4+ ura4sj-D3</i> h+                   |
| SOJ2510                                     | <i>wee1-as8::ura4+ rga4-mNeonGreen::kanR ura4sj-D3</i> h+                       |
| SOJ2602                                     | <i>rga6-GFP::ura4+ ura4sj-D3</i> h+                                             |
| SOJ2622                                     | <i>wee1-as8::ura4+ rga6-GFP::ura4+ rlc1-mCherry::ura4+::kanR ura4sj-D3</i> h+   |
| SOJ2825                                     | <i>scd2-mNeonGreen::ura4+ ura4sj-D3</i> h-                                      |
| SOJ2834                                     | <i>wee1-as8::kanR scd2-mNeonGreen::ura4+ ura4sj-D3</i> h-                       |
| SOJ3615                                     | <i>gef1Δ::ura4+ ura4sj-D3</i>                                                   |
| SOJ3316                                     | <i>wee1-as8::kanR gef1Δ::ura4+ ura4sj-D3</i>                                    |
| SOJ3269                                     | <i>rga4Δ::kanR</i> (prototroph)                                                 |
| SOJ2477                                     | <i>wee1-as8::ura4+ rga4Δ::kanR ura4sj-D3</i>                                    |
| SOJ3608                                     | <i>rga6Δ::natR</i> (prototroph)                                                 |
| SOJ3317                                     | <i>wee1-as8::ura4+ rga6Δ::natR ura4sj-D3</i>                                    |
| SOJ3628                                     | <i>rga4Δ::kanR gef1Δ::ura4+ ura4sj-D3</i>                                       |
| SOJ3336                                     | <i>wee1-as8::ura4+ rga4Δ::kanR gef1Δ::ura4+ ura4sj-D3</i>                       |
| SOJ1360                                     | <i>rga4Δ::ura4+ pom1-GFP::ura4+::kanR ura4sj-D3</i>                             |
| SOJ2532                                     | <i>wee1-as8::ura4+ rga4Δ::ura4+ pom1-GFP::ura4+::kanR ura4sj-D3</i>             |
| SOJ3324                                     | <i>wee1-as8::ura4+ rga4Δ::kanR rlc1-GFP::kanR nhp6-mCherry::ura4+ ura4sj-D3</i> |
| SOJ3329                                     | <i>wee1-as8::kanR scd1Δ::ura4+ ura4sj-D3</i>                                    |
| SOJ3338                                     | <i>rga4Δ::kanR rga6Δ::natR</i> (prototroph)                                     |
| SOJ3610                                     | <i>nhp6-mCherry::ura4+ ura4sj-D3</i>                                            |
| SOJ3607                                     | <i>rga4Δ::kanR nhp6-mCherry::ura4+ ura4sj-D3</i>                                |
| SOJ3420                                     | <i>wee1-G788E::kanR rga4Δ::ura4+ ura4sj-D3</i>                                  |
| SOJ3686                                     | <i>wee1-G788E::kanR rga4Δ::kanR nhp6-mCherry::ura4+ ura4sj-D3</i>               |
| <b><i>Schizosaccharomyces pombe</i></b>     |                                                                                 |
| <b>Collection No.</b>                       | <b>Genotype</b>                                                                 |
| SO7812                                      | wild type strain 972 h-                                                         |
| From Kaz Shiozaki                           | CRIB-3xGFP:: <i>ura4+ ura4-294 leu1-32</i> h-                                   |
| From Fulvia Verde                           | <i>rga4-GFP::kanR ade6-704 leu1-32 ura4D-18</i> h+                              |
| From Mohan Balasubramanian                  | <i>wee1-50 leu1-32</i> h-                                                       |
| SO8327                                      | <i>wee1-50 ade6-210/216 ura4-D18? leu1-32?</i> (diploid)                        |
| SO7404                                      | <i>tea1Δ::ura4+ ade6-21x leu? ura?</i> h+                                       |

|                 |                                                                               |
|-----------------|-------------------------------------------------------------------------------|
| SO7405          | <i>tea1Δ::ura4+ ade6-21x leu? ura? h-</i>                                     |
| From Iain Hagan | <i>wee1-as8 (V644G, M700F)::kanR h-</i>                                       |
| SO8235          | <i>wee1-as8::kanR ade6-210/216 leu1-32? (diploid)</i>                         |
| SO8286          | <i>wee1-as8::kanR tea1Δ::ura4+ ade6-210 ura4-D18 leu1-32 h-</i>               |
| SO8298          | <i>wee1-as8::kanR tea1 Δ::ura4+ ade6-210/216 ura4-D18? leu1-32? (diploid)</i> |
| SO8243          | <i>ade6-210/216 ura4-D18 leu1-32 (diploid)</i>                                |
| SO8308          | <i>wee1-50 tea1 Δ::ura4+ ade6-216 ura4-D18 leu1-32 h-</i>                     |
| SO8309          | <i>wee1-50 tea1 Δ::ura4+ ade6-210/216 ura4-D18 leu1-32? (diploid)</i>         |

Supplementary table 1.

List of *Schizosaccharomyces japonicus* and *Schizosaccharomyces pombe* strains

|                                                |                                                              |
|------------------------------------------------|--------------------------------------------------------------|
| ATACTCGAGGGCATGGTTTGGCTGAG                     | XhoI_promoter_pak1_sj<br>(Schizosaccharomyces japonicus) fwd |
| TATCCCGGGCTTGAAGACTAAAAGCCTG                   | Smal_promoter_pak1_sj rev                                    |
| ATACCCGGGATGACTAGTGCAAGTATTAC                  | Smal_gic2_sc (Saccharomyces cerevisiae) fwd                  |
| TACCCGGGcCTTATTTTCGTGCGATCTTG                  | Smal_gic2_sc rev                                             |
| TATCCCGGGCAGCTTGTTAATTAAC                      | Smal_gef1_sj C-terminus tagging fwd                          |
| ATAGGATCCGGCCTCCTCAGCAGAT                      | BamHI_gef1_sj C-terminus tagging rev                         |
| TATGGGCCCGAGGCCTAACTTTATGATG                   | ApaI_gef1_sj 3'UTR fwd                                       |
| ATACCCGGGACGACACGGTTTCA                        | Smal_gef1_sj 3'UTR rev                                       |
| TATCCCGGGAATTATTCAAAGAACCT                     | Smal_rga4_sj C-terminus tagging fwd                          |
| ATAGGATCCGAAAAGCTCCTCAACGTG                    | BamHI_rga4_sj C-terminus tagging rev                         |
| TATGGGCCCAATCATAAGAAACATATG                    | ApaI_rga4_sj 3'UTR fwd                                       |
| ATACCCGGGAGGAGTGACAGAGT                        | Smal_rga4_sj 3'UTR rev                                       |
| TATCCCGGGAATGAGCAAGACTG                        | Smal_scd1_sj C-terminus tagging fwd                          |
| ATAGGATCCGGGGCTAAGCTTGTGAA                     | BamHI_scd1_sj C-terminus tagging rev                         |
| TATGGGCCATAATGCTTGTCTAC                        | ApaI_scd1_sj 3'UTR fwd                                       |
| ATACCCGGGAGTTGAATCAGAATC                       | Smal_scd1_sj 3'UTR rev                                       |
| TATCTCGAGAAAGTTCGGCTTG                         | XhoI_rga6_sj C-terminus tagging fwd                          |
| ATACCCGGGAGTTTTTTCTTCTTAAAAAGTC                | Smal_rga6_sj C-terminus tagging rev                          |
| TATGGGCCCTACCGACTTTTTGAC                       | ApaI_rga6_sj 3'UTR fwd                                       |
| ATACTCGAGGTTCAAGGTAATTCC                       | XhoI_rga6_sj 3'UTR rev                                       |
| TATATCGATTGCGGTATATCCCTT                       | ClaI_scd2_sj C-terminus tagging fwd                          |
| ATAGGATCCTTCCGAAATGAAGCCGTC                    | BamHI_scd2_sj C-terminus tagging fwd                         |
| TATGGGCCGGTTTGCTTGTTCATG                       | ApaI_scd2_sj 3'UTR fwd                                       |
| ATAATCGATAGGGAATAACGTTGTCG                     | ClaI_scd2_sj 3'UTR rev                                       |
| ATACTCGAGTTATCACGTACGTTTTTC                    | XhoI_tea4_sj C-terminus tagging fwd                          |
| AAAAAGATCTTAAAGATTTACAGCAGTT                   | BglII_tea4_sj C-terminus tagging fwd                         |
| TATGGTACCTAAAAACAATCGGTTCT                     | KpnI_tea4_sj 3'UTR fwd                                       |
| ATACTCGAGATGTGCATTTGTCCAAA                     | XhoI_tea4_sj 3'UTR rev                                       |
| TATGGGCCGTGAAAAACTAAAAG                        | ApaI_wee1-G788E_sj mutagenic fragment 1 fwd                  |
| CTTCGTAATTTGTTGCTCGGCCCTGCGTC                  | wee1-G788E_sj mutagenic fragment 1 rev                       |
| aaGCAACAATTTACGAAGGA                           | wee1-G788E_sj mutagenic fragment 2 fwd                       |
| AAACCCGGGACATTAGACATATCAAGG                    | Smal_wee1_sj_3'UTR rev                                       |
| TATGGGCCACTCCCATTATGCCTCT                      | ApaI_wee1-as8_sj fragment 1 fwd                              |
| ACCTTGCATGTACAAGTAG                            | wee1-as8_sj fragment 1 rev                                   |
| TGGCTACTTGTACATGCAAggtGAGCTTTGCGAAAAT<br>GGAAG | wee1_as8_sj mutagenic fragment fwd                           |
| GGTGCCCTCAAACGTAATgaaAATGTTTGCGGGCTT<br>CAAATC | wee1_as8_sj mutagenic fragment fwd                           |
| TTCATTACGTTTGAGGGCA                            | wee1-as8_sj fragment 2 fwd                                   |
| ATACCCGGGTCAGAAGTAGGAAGCCAG                    | Smal_wee1-as8_sj fragment 2 rev                              |
| TATGGTACCTGGCTTCTACTTCTGA                      | KpnI_wee1_as8_sj 3'UTR fwd                                   |
| ATAGGGCCCGTTTCTCGTAACAGCTAT                    | ApaI_wee1_as8_sj '3'UTR rev                                  |
| TATCCCGGTATTGAGAGTCGGT                         | Smal_cdc2_sj 5'UTR to amplify ORF fwd                        |
| ATACCGCGCAAGTGTGACAGGAGTG                      | SacII_cdc2_sj 3'UTR to amplify ORF rev                       |
| TATGGGCCACCCCTTTTCTTCTGTTCC                    | ApaI_cdc2_sj 3'UTR fwd                                       |

|                                                                                                             |                                         |
|-------------------------------------------------------------------------------------------------------------|-----------------------------------------|
| ATACCCGGGAACATTTTCTGCACCACCA                                                                                | Smal_cdc2_sj 3'UTR rev                  |
| GCGAGTTTCAGATTGtCTTCTTTGTGCATCAGCAA                                                                         | cdc2_1w_sj mutagenic fragment 1 rev     |
| AAGaCAATCTGAAACTCGCCGA                                                                                      | cdc2_1w_sj mutagenic fragment 2 fwd     |
| TATCCCGGGATGCAGCTGCTTC                                                                                      | Smal_scd1_sj 5'UTR to knockout ORF fwd  |
| ATAGGATCCGTCATCAACGTTGCGAGA                                                                                 | BamHI_scd1_sj 5'UTR to knockout ORF rev |
| TATGGGCCATAATGCTTGTCTAC                                                                                     | ApaI_scd1_sj 3'UTR to knockout ORF fwd  |
| ATACCCGGGAGTTGAATCAGAATC                                                                                    | Smal_scd1_sj 3'UTR to knockout ORF rev  |
| TATCCCGGGTCTTTACAATTCTCTG                                                                                   | Smal_gef1_sj 5'UTR to knockout ORF fwd  |
| ATAGGATCCGTGTCGTAACGTTTGAA                                                                                  | BamHI_gef1_sj 5'UTR to knockout ORF rev |
| TATGGGCCGAGGCCTAACTTTATGATG                                                                                 | ApaI_gef1_sj 3'UTR to knockout ORF fwd  |
| ATACCCGGGACGACACGGTTTCA                                                                                     | Smal_gef1_sj 3'UTR to knockout ORF rev  |
| ATACCCGGGCCGTCAGATCATTG                                                                                     | Smal_rga4_sj 5'UTR to knockout ORF fwd  |
| ATAGGGCCCGCTTATGAAATGAACGGTG                                                                                | ApaI_rga4_sj 5'UTR to knockout ORF rev  |
| TATTCTAGATTGACCACGTTGAGGAGC                                                                                 | XbaI_rga4_sj 3'UTR to knockout ORF fwd  |
| ATACCCGGGAGGAGTGACAGAGTTC                                                                                   | Smal_rga4_sj 3'UTR to knockout ORF rev  |
| TGTTCTAAATCCGTCATATTGGCTATAAAAACTACGT<br>TACGTATACGAAATCTTAATGGACGATACTTCTCTTG<br>CCTCGTgcccacttctaaataagc  | rga4_sj kanMX6 cassette knockout fwd    |
| TCGAACGTCATCATACCTATCTAGAGTCATAGTAAG<br>GAAACATAACATCATATGTTTCTTATGATTGGGGTTA<br>AGATTAaattcgagctcgittaaac  | rga4_sj kanMX6 cassette knockout rev    |
| CGGTACAGGTTGTGACGTCTTCCAGCACTCACAGGT<br>TTACTTATTTTTCCATCTTATCCTGTCATTTTTTGT<br>CTTCTTGgttagctgcctcgtc      | rga6_sj natMX6 cassette knockout fwd    |
| AATTATACACTTTCCTTTGCAACACAATATACAGAAA<br>AAGGATTGTCAAAAAGTCGGTAGGGAGGTAATTTAC<br>CACATCATtgatggcggcgttagtat | rga6_sj natMX6 cassette knockout rev    |
| GTTCTCAGCAACTCCTT                                                                                           | rga4_sj 5'UTR genotyping fwd            |
| CACAAGTTATGCATCTGA                                                                                          | rga4_sj ORF genotyping rev              |
| CTACTCATCCGAGATC                                                                                            | rga4_sj ORF genotyping fwd              |
| TGGAGCACCTCTAGATAT                                                                                          | rga4_sj 3'UTR genotyping rev            |
| GCTTTTATAACAACACTGGAAT                                                                                      | rga6_sj 5'UTR genotyping fwd            |
| TCGTTACCTGAGGACGAA                                                                                          | rga6_sj ORF genotyping rev              |
| TCGCCCTTATCGCCTTC                                                                                           | rga6_sj ORF genotyping fwd              |
| AGACGGATGCTTGAATCA                                                                                          | rga6_sj 3'UTR genotyping rev            |
| TTCACTGCGTCAGCTTGT                                                                                          | gef1_sj 5'UTR genotyping fwd            |
| TCATCGTGAACGCTCGT                                                                                           | gef1_sj ORF genotyping rev              |
| CAGATGCAGATGTAACGTG                                                                                         | gef1_sj ORF genotyping fwd              |
| GAGTCTCACCTAAACGAAG                                                                                         | gef1_sj 3'UTR genotyping rev            |
| TACTAATCAGCAGCGCTG                                                                                          | scd1_sj 5'UTR genotyping fwd            |
| CACGCGGATGTTTTACAAC                                                                                         | scd1_sj ORF genotyping rev              |
| GCCTTTGAGTATTGCGTGT                                                                                         | scd1_sj ORF genotyping fwd              |
| CTCAGATGAAGTTGTTTCTC                                                                                        | scd1_sj 3'UTR genotyping rev            |

## Supplementary table 2.

### List of primers
